# Supplementary material for: Interaction of heterotrimeric kinesin-II with IFT-B–connecting tetramer is crucial for ciliogenesis
Source: PubMed Central journal article supplement — J Cell Biol. 2018 Aug 6;217(8):2867–76. doi: 10.1083/jcb.201801039 (PMC6080941; doi:10.1083/jcb.201801039), 2018-08-06
Supplement: JCB_201801039_sm.pdf [file JCB_201801039_sm.pdf]

## Supplemental material

Funabashi et al., <https://doi.org/10.1083/jcb.201801039>

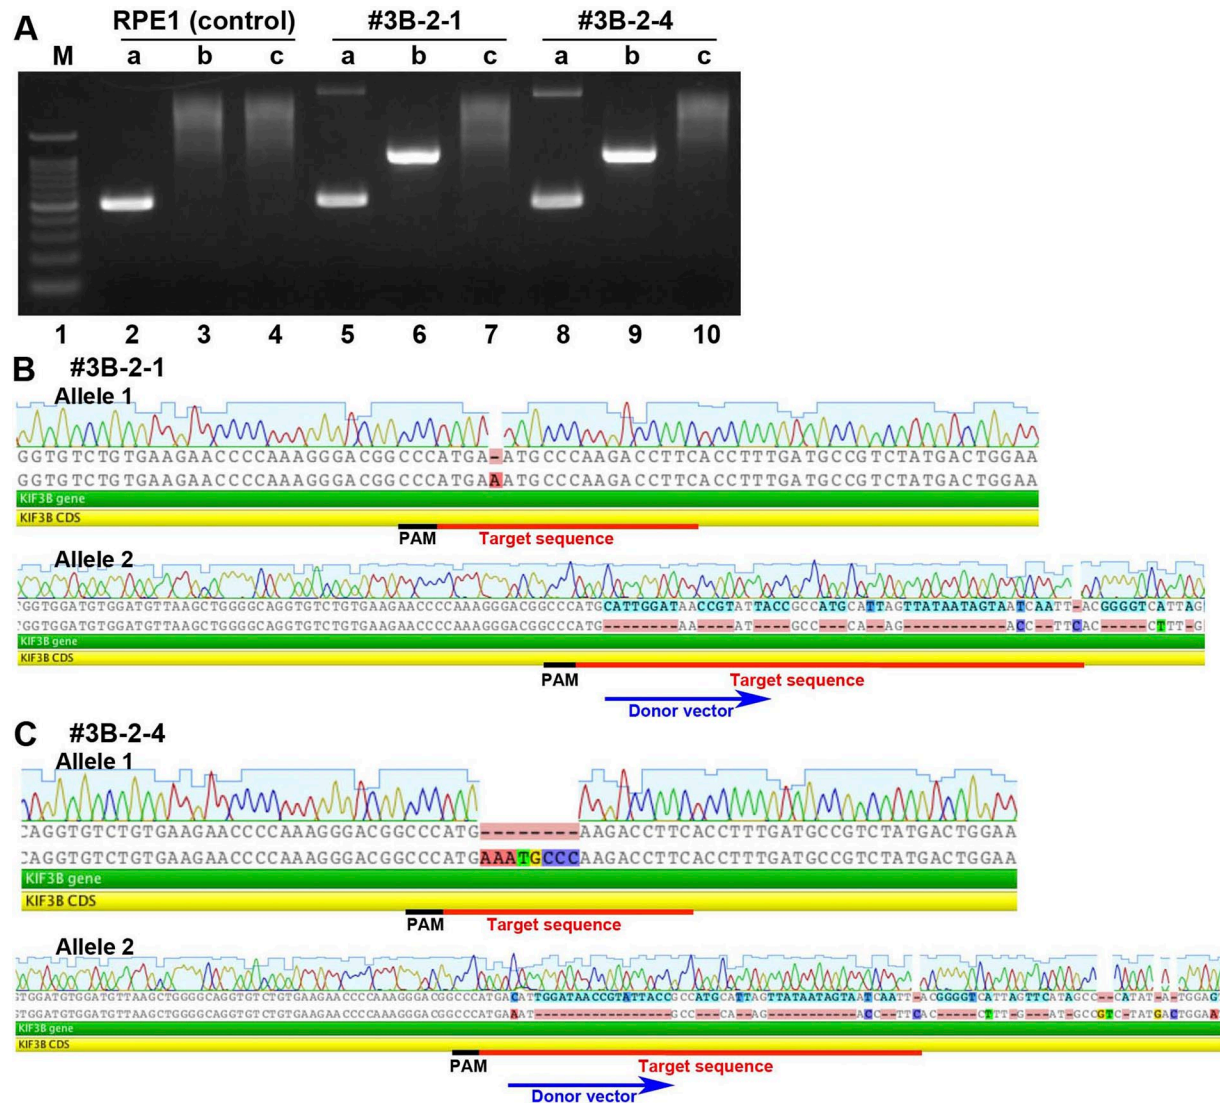

Figure S1. **Genomic PCR and sequence analyses of the *KIF3B*-KO cell lines.** (A) Genomic DNA was extracted from control hTERT-RPE1 cells and from the *KIF3B*-KO cell lines 3B-2-1 and 3B-2-4, which were established using a donor knock-in vector containing the target sequence, and subjected to PCR using the indicated primer sets (Table S2) to detect alleles with a small indel or no insertion (a), or with forward (b) or reverse (c) integration of the donor knock-in vector. Lane 1 (M), 100-bp ladder marker (the most intense band, 500 bp). (B and C) Alignments of allele sequences of the 3B-2-1 (B) and 3B-2-4 (C) cell lines determined by direct sequencing of the genomic PCR products. Red and black lines indicate the target sequence and protospacer-adjacent motif (PAM) sequence, respectively, and blue arrows indicate the direction of donor vector integration. CDS, coding sequence.

Table S1. **Plasmid vectors used in this study**

| <b>Vector</b>     | <b>Insert</b>                                   | <b>Reference</b>                        |
|-------------------|-------------------------------------------------|-----------------------------------------|
| pCAG2-EGFP-C      | Human KIF3A                                     | This study                              |
| pCAG2-mCherry-C   | Human KIF3A                                     | This study                              |
| pCAG2-EGFP-C      | Human KIF3B                                     | This study                              |
| pCAG2-mCherry-C   | Human KIF3B                                     | This study                              |
| pCAG2-EGFP-C      | Human KAP3                                      | This study                              |
| pCAG2-mCherry-C   | Human KAP3                                      | This study                              |
| pCAG2-EGFP-C      | Human KIF17                                     | <a href="#">Funabashi et al. (2017)</a> |
| pCAG2-EGFP-C      | Human KIF3B (1–704)                             | This study                              |
| pCAG2-EGFP-C      | Human KIF3B (1–662)                             | This study                              |
| pCAG2-EGFP-C      | Human KIF3B (1–625)                             | This study                              |
| pCAG2-EGFP-C      | Human KIF3B (1–579)                             | This study                              |
| pCAG2-EGFP-C      | Human KIF3B ( $\Delta$ CC:<br>$\Delta$ 346–579) | This study                              |
| pRRLsinPPT-EGFP-N | Human KIF3B                                     | This study                              |
| pRRLsinPPT-EGFP-N | Human KIF3B (1–704)                             | This study                              |
| pRRLsinPPT-EGFP-N | Human KIF3B (1–662)                             | This study                              |
| pRRLsinPPT-EGFP-N | Human KIF3B (1–625)                             | This study                              |
| pRRLsinPPT-EGFP-N | Human KIF3B (1–579)                             | This study                              |
| pTagRFP-T-N       | Human IFT20                                     | <a href="#">Kato et al. (2016)</a>      |
| pTagRFP-T-C       | Human IFT22                                     | <a href="#">Kato et al. (2016)</a>      |
| pTagRFP-T-C       | Human IFT25                                     | <a href="#">Kato et al. (2016)</a>      |
| pTagRFP-T-C       | Human IFT27                                     | <a href="#">Kato et al. (2016)</a>      |
| pTagRFP-T-C       | Human IFT38                                     | <a href="#">Kato et al. (2016)</a>      |
| pCAG-mCherry-C    | Human IFT46                                     | <a href="#">Kato et al. (2016)</a>      |
| pCAG-mCherry-C    | Human IFT52                                     | <a href="#">Kato et al. (2016)</a>      |
| pTagRFP-T-C       | Human IFT54                                     | <a href="#">Kato et al. (2016)</a>      |
| pCAG-mCherry-C    | Human IFT56                                     | <a href="#">Funabashi et al. (2017)</a> |
| pCAG-TagRFP-T-C   | Human IFT56                                     | <a href="#">Kato et al. (2016)</a>      |
| pTagRFP-T-C       | Human IFT57                                     | <a href="#">Kato et al. (2016)</a>      |
| pCAG2-mCherry-C   | Human IFT70B                                    | <a href="#">Kato et al. (2016)</a>      |
| pCAG-mCherry-C    | Human IFT74                                     | <a href="#">Kato et al. (2016)</a>      |
| pCAG-mCherry-N    | Human IFT80                                     | <a href="#">Kato et al. (2016)</a>      |
| pCAG-mCherry-C    | Human IFT81                                     | <a href="#">Kato et al. (2016)</a>      |
| pCAG-mCherry-C    | Human IFT88                                     | <a href="#">Kato et al. (2016)</a>      |
| pCAG2-mCherry-C   | Human IFT172                                    | <a href="#">Kato et al. (2016)</a>      |
| pmCherry-C1       | IFT43                                           | <a href="#">Hirano et al. (2017)</a>    |
| pCAG2-mCherry-C   | IFT121                                          | <a href="#">Hirano et al. (2017)</a>    |
| pCAG2-mCherry-C   | IFT122                                          | <a href="#">Hirano et al. (2017)</a>    |
| pCAG2-mCherry-C   | IFT139                                          | <a href="#">Hirano et al. (2017)</a>    |
| pCAG2-mCherry-C   | IFT140                                          | <a href="#">Hirano et al. (2017)</a>    |
| pCAG2-mCherry-C   | IFT144                                          | <a href="#">Hirano et al. (2017)</a>    |
| pmCherry-C1       | TULP3                                           | <a href="#">Hirano et al. (2017)</a>    |

Table S2. **Oligodeoxyribonucleotides used in this study**

| <b>Name</b>      | <b>Sequence (5'-3')</b>   |
|------------------|---------------------------|
| pTagBFP-N-RV2    | CGTAGAGGAAGCTAGTAGCCAGG   |
| KIF3B-genome-FW  | GCTGCAATGACAACGGTACTG     |
| KIF3B-genome-RV  | GATGTGGGTGAAGATATGGTC     |
| KIF3B-gRNA 2-S   | CACCGAAGGTCTTGGGCATTTTCAT |
| KIF3B-gRNA 2-AS  | AAACATGAAATGCCCAAGACCTTC  |
| KIF3B-Donor 2-AS | TCCAATGAAATGCCCAAGACCTTC  |

## References

- Funabashi, T., Y. Katoh, S. Michisaka, M. Terada, M. Sugawa, and K. Nakayama. 2017. Ciliary entry of KIF17 is dependent on its binding to the IFT-B complex via IFT46-IFT56 as well as on its nuclear localization signal. *Mol. Biol. Cell.* 28:624–633. <https://doi.org/10.1091/mbc.e16-09-0648>
- Hirano, T., Y. Katoh, and K. Nakayama. 2017. Intraflagellar transport-A complex mediates ciliary entry and retrograde trafficking of ciliary G protein-coupled receptors. *Mol. Biol. Cell.* 28:429–439. <https://doi.org/10.1091/mbc.e16-11-0813>
- Katoh, Y., M. Terada, Y. Nishijima, R. Takei, S. Nozaki, H. Hamada, and K. Nakayama. 2016. Overall architecture of the intraflagellar transport (IFT)-B complex containing Cluap1/IFT38 as an essential component of the IFT-B peripheral subcomplex. *J. Biol. Chem.* 291:10962–10975. <https://doi.org/10.1074/jbc.M116.713883>
